# Supplementary material for: The nucleotide composition of microsatellites impacts both replication fidelity and mismatch repair in human colorectal cells
Source: PubMed Central journal article supplement — Hum Mol Genet. 2010 Apr 26;19(13):2648–57. doi: 10.1093/hmg/ddq175 (PMC2883347; doi:10.1093/hmg/ddq175), 2010-04-26

## **SUPPLEMENTARY FIGURE LEGENDS:**

**Figure S1. Characterization of single cell clones.** (A) Sequence analysis of representative stable single cell clones (HCT116 G10.1 and HCT116+chr3 A10.1). Genomic DNA was isolated, the EGFP region containing the DNA repeat was amplified by PCR and sequenced. (B) Verification of plasmid insertions with Southern blot analysis. 20 µg of total DNA was digested with *BamHI*, *EcoRV*, or both, resolved on a 0.8% agarose gel, and transferred onto a nylon membrane. Complementary EGFP cDNA was labeled with [P-32]-dCTP, hybridized, and the blot was analyzed by autoradiography. (C) Flow cytometric analysis of unsorted HCT116 (CA)26.1 and HCT116+chr3 (CA)26.1 cells showing accumulation of mutated cells by EGFP expression.

**Figure S2. Single cell sorting and cycle sequencing.** (A) M0 (non-fluorescent), M1 (dim-fluorescent) and M2 (strong-fluorescent) populations of stably transfected HCT116 G10.2 cells were sorted into 96-well plates on a FACSAria cell sorter. (B) After a growth period of some days an image of each colony was captured by fluorescent microscopy, (C) DNA was extracted and the EGFP region harboring the microsatellite was sequenced. Representative sequences of HCT116 G10.2 cells show M0 cells without mutation, M1 cells displaying a mixture of wildtype and -1 frameshift mutations and M2 cells with a -1bp frameshift.

Campregher, Figure S1

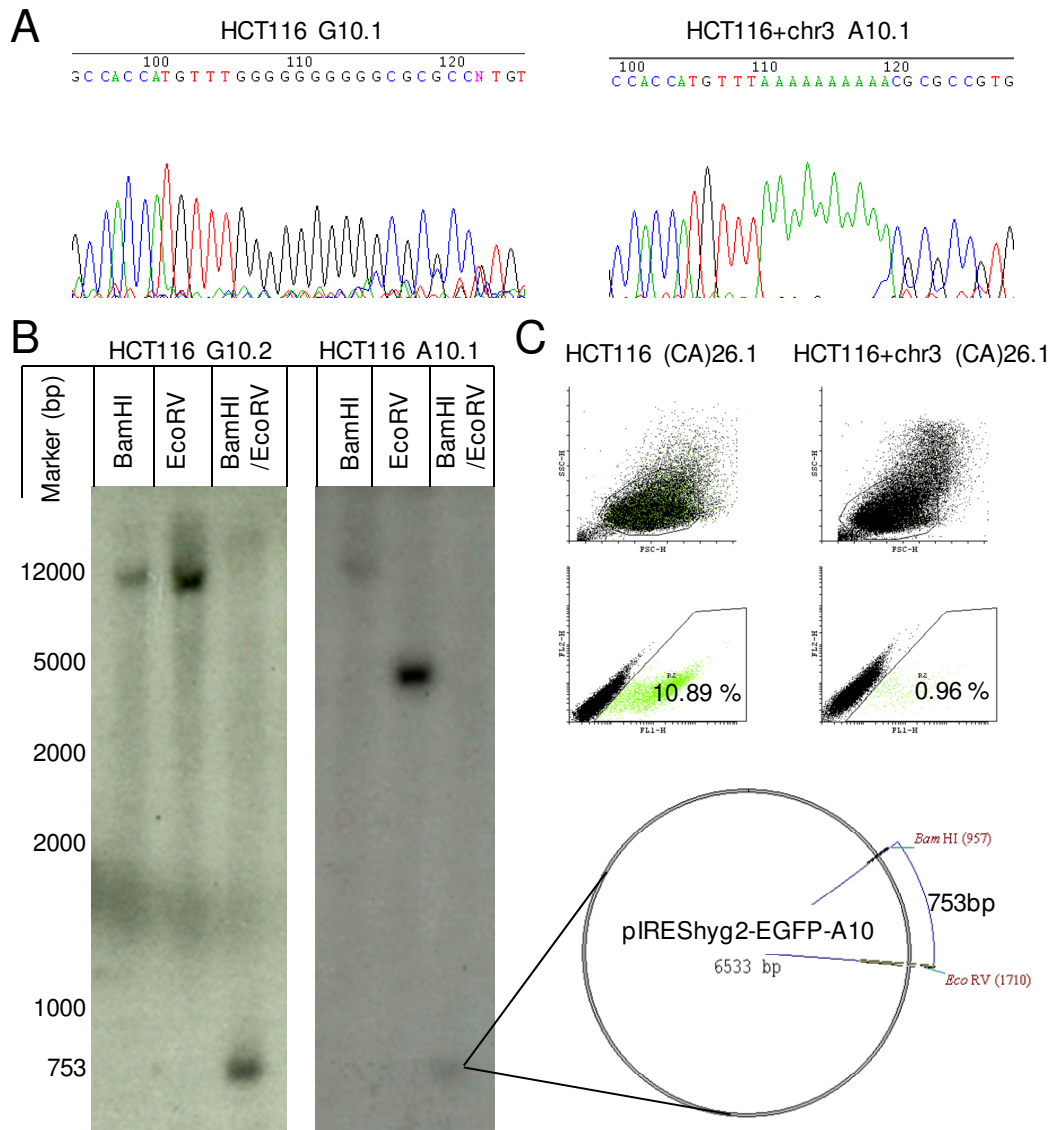

Campregher, Figure S2

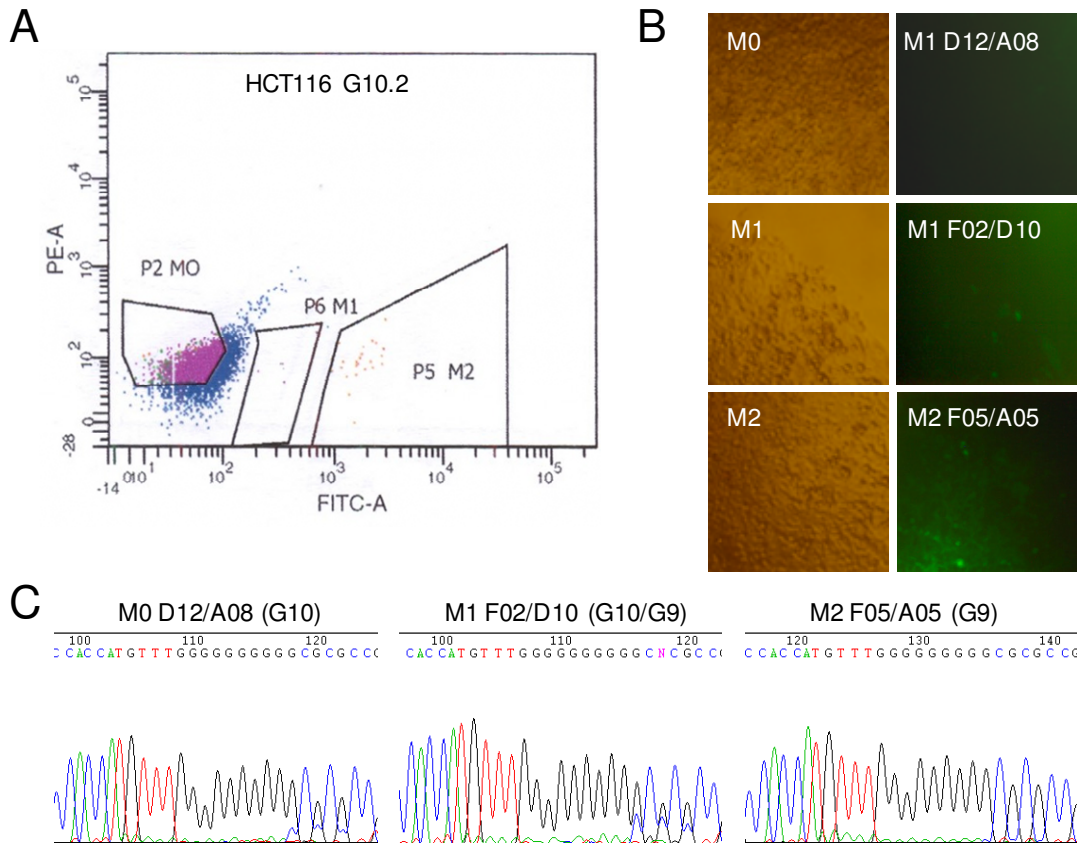

Supplement: ddq175_1.pdf [file ddq175_1.pdf]
